# Supplementary material for: Synthesis and characterization of thienylene–phenylene copolymers with oligo(ethylene oxide) side chains
Source: Royal Society of Chemistry journal article supplement (doi:10.1039/b406613h), 2004-01-01
Supplement: b406613h.pdf [file b406613h.pdf]

1.

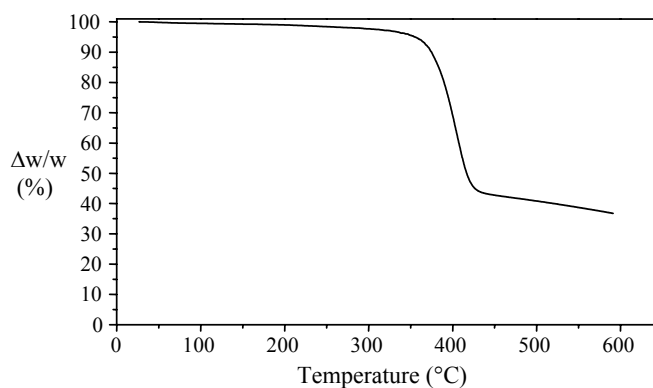

TGA chart of copolymer **7** in nitrogen. Heating rate: 10°C/min.

## 2. Synthesis of monomers and copolymers (6-8)

**2-(2-Methoxyethoxy)ethyl-p-toluenesulfonate.** Under nitrogen atmosphere, 2 g ( $1.66 \times 10^{-2}$  mole) of 2-(2-methoxyethoxy)ethanol and 7.86 g ( $9.96 \times 10^{-2}$  mole) of pyridine were dissolved in 50 mL of freshly distilled  $\text{CH}_2\text{Cl}_2$ . The medium was cooled in an ice bath. Tosyl chloride ( $2.49 \times 10^{-2}$  mole; 4.74 g) was then slowly added by portions to the reaction mixture. After the addition was complete, the cooling bath was removed and the mixture was stirred at room temperature overnight. It was then hydrolyzed with a 0.1M HCl solution, extracted three times with ether, washed, dried over magnesium sulfate and concentrated under vacuum. The crude product was obtained in 85 % yield and was used without further purification.  $^1\text{H}$  NMR ( $\text{CDCl}_3$ , 200 MHz): 2.35 (3H, s,  $\text{CH}_3$ -Ph), 3.37 (3H, s,  $\text{OCH}_3$ ), 3.53 (2H, t,  $J=5\text{Hz}$ ,  $\text{CH}_2$ ), 3.57 (2H, t,  $J=5\text{Hz}$ ,  $\text{CH}_2$ ), 3.65 (2H, t,  $J=5\text{Hz}$ ,  $\text{CH}_2$ ), 4.16 (2H, t,  $J=5\text{Hz}$ ,  $\text{CH}_2$ ), 7.31 (2H, d,  $J=8\text{Hz}$ ,  $\text{H}_{\text{ar}}$  of Ts), 7.8 (2H, d,  $J=8\text{Hz}$ ,  $\text{H}_{\text{ar}}$  of Ts).  $\nu_{\text{max}}$  (KBr)/ $\text{cm}^{-1}$ : 2951, 2878, 1483, 1445, 1356, 1260, 1105, 1020, 948, 850, 796.

**2-(2-Butoxyethoxy)ethyl-p-toluenesulfonate.** It was prepared in a similar way as 2-(2-methoxyethoxy)ethyl-p-toluenesulfonate using 2 g ( $1.23 \times 10^{-2}$  mole) of 2-(2-butoxyethoxy)ethanol, 5.83 g ( $7.38 \times 10^{-2}$  mole) of pyridine dissolved in 50 mL of  $\text{CH}_2\text{Cl}_2$  and 3.52g ( $1.84 \times 10^{-2}$  mole) of tosyl chloride. It was obtained in 90 % yield.  $^1\text{H}$  NMR ( $\text{CDCl}_3$ , 200 MHz): 0.88 (3H, t,  $J=5\text{Hz}$ ,  $\text{CH}_3$ ), 1.35-1.55 (4H, m, 2  $\text{CH}_2$ ), 2.44 (3H, s,  $\text{CH}_3$ -Ph), 3.40 (2H, t,  $J=6\text{Hz}$ ,  $\text{CH}_2$ ), 3.55 (4H, m,  $\text{CH}_2$ ), 3.68 (2H, m,  $\text{CH}_2$ ), 4.15 (2H, m,  $\text{CH}_2$ ), 7.3 (2H, d,  $J=8\text{Hz}$ ,  $\text{H}_{\text{ar}}$  of Ts), 7.8 (2H, d,  $J=8\text{Hz}$ ,  $\text{H}_{\text{ar}}$  of Ts).  $\nu_{\text{max}}$  (KBr)/ $\text{cm}^{-1}$ : 2947, 2880, 1485, 1443, 1357, 1261, 1104, 1019, 942, 852, 795.

**1,4-Dibromo-2,5-bis(dioxa-3,6-heptyloxy)benzene (2).** Under nitrogen, a mixture containing 1.35 g ( $5 \times 10^{-3}$  mole) of **1** and 6.51 g ( $2 \times 10^{-2}$  mole) of  $\text{Cs}_2\text{CO}_3$  in 40 mL of freshly distilled THF was introduced in a three necked flask equipped with a condenser. 2.6 g ( $9.4 \times 10^{-3}$  mole) of 2-(2-methoxyethoxy)ethyl-p-toluenesulfonate in 20 mL of THF was slowly added to the reaction mixture. After the addition was complete, the mixture was refluxed for 45 hours then hydrolyzed with an iced NaOH (0.5 N) aqueous solution. The product was extracted

with ether (3x30 mL), washed with NH<sub>4</sub>Cl (0.1N), dried over magnesium sulfate and concentrated under vacuum. **2** was obtained as a pale yellow solid (2.35 g, 5 x 10<sup>-3</sup> mole, 53%). m.p. 53-55°C; Anal. Calcd for (C<sub>16</sub>H<sub>24</sub>O<sub>6</sub>Br<sub>2</sub>): C, 40.68; H, 5.08; Br, 33.90. Found: C, 40.48; H, 5.16; Br, 32.92. <sup>1</sup>H NMR (CDCl<sub>3</sub>, 200 MHz) 3.39 (6H, s, OMe), 3.56 (4H, t, *J*= 5Hz, CH<sub>2</sub>-OMe), 3.77 (4H, t, *J*= 5Hz, CH<sub>2</sub>-CH<sub>2</sub>-OMe), 3.85 (4H, t, *J*= 5Hz, CH<sub>2</sub>-CH<sub>2</sub>-OPh), 4.15 (4H, t, *J*= 5Hz, CH<sub>2</sub>-OPh), 7.15 (2H, s, H<sub>phenyl</sub>). <sup>13</sup>C NMR (CDCl<sub>3</sub>, 200MHz) 59.0, 69.5, 70.2, 71.0, 72.0, 111.3, 119.1, 150.2.  $\nu_{\max}$  (KBr)/cm<sup>-1</sup>: 3081, 2899, 2727, 1619, 1461, 1260, 1100, 915, 804. MS: *m/z*: 472 (M).

**1,4-Dibromo-2,5-bis(dioxa-3,6-decyloxy)benzene (3).** **3** was prepared as described for **2** using 1.35 g (5 x 10<sup>-3</sup> mole) of **1**, 6.51 g (2 x 10<sup>-2</sup> mole) of Cs<sub>2</sub>CO<sub>3</sub> in 40 mL of THF and 3 g (9.4 x 10<sup>-3</sup> mole) of 2-(2-butoxyethoxy)ethyl-p-toluenesulfonate diluted in 20 mL of dry THF. **3** was obtained as a brown oil (2.68 g, 4.8 x 10<sup>-3</sup> mole, 51%). Anal. Calcd for (C<sub>22</sub>H<sub>36</sub>O<sub>6</sub>Br<sub>2</sub>): C, 47.52; H, 6.55; Br, 28.76. Found: C, 47.63; H, 6.69; Br, 27.79. <sup>1</sup>H NMR (CDCl<sub>3</sub>, 200 MHz) 0.90 (6H, t, *J*=6Hz, CH<sub>3</sub>), 1.33 (4H, m, CH<sub>2</sub>-CH<sub>3</sub>), 1.57 (4H, m, CH<sub>2</sub>-CH<sub>2</sub>-CH<sub>3</sub>), 3.47 (4H, t, *J*=5Hz, CH<sub>2</sub>-O), 3.62-3.73 (8H, m, -CH<sub>2</sub>-CH<sub>2</sub>-OBu), 3.87 (4H, t, *J*=5Hz, CH<sub>2</sub>-CH<sub>2</sub>OAr), 4.12 (4H, t, *J*=5Hz, CH<sub>2</sub>-OAr), 7.15 (2H, s, H<sub>phenyl</sub>). <sup>13</sup>C NMR (CDCl<sub>3</sub>, 200MHz) 12.7, 18.0, 30.5, 68.3, 69.0, 69.9, 70.0, 70.9, 110.1, 118.0, 149.1.  $\nu_{\max}$  (KBr)/cm<sup>-1</sup>: 2947, 2861, 1485, 1452, 1357, 1219, 1128, 1066, 938, 852, 780. MS: *m/z*: 554 (M-2).

**1,4-Bis(trioxa-3,6,9-decyloxy)benzene (4).** Under nitrogen, 9.43 g (4.77 x 10<sup>-2</sup> mole) of hydroquinone bis(2-hydroxyethyl)ether diluted in 100 mL of DMSO and 13.3 g (0.235 mole) of powdered KOH were introduced into a three necked flask equipped with a condenser. 26.13 g (9.5 10<sup>-2</sup> mole) of 2-(2-methoxyethoxy)ethyl-p-toluenesulfonate in 50 mL of DMSO were slowly added to the reaction mixture. After the addition was complete, the mixture was stirred for 72 hours at room temperature. The medium was hydrolyzed and the product was extracted with ether (3 x 40 mL), washed with water to neutrality, dried over magnesium sulphate and concentrated under vacuum. **4** was obtained as a pale yellow oil (14.57 g, 3.63 x 10<sup>-2</sup> mole, 76%). Anal. Calcd for (C<sub>20</sub>H<sub>34</sub>O<sub>8</sub>): C, 59.71; H, 8.45. Found: C, 59.35; H, 8.69. <sup>1</sup>H NMR (CDCl<sub>3</sub>, 200 MHz) 3.38 (6H, s, OMe), 3.56 (4H, t, *J*= 5Hz, CH<sub>2</sub>-OMe), 3.70 (12H, m, CH<sub>2</sub>), 3.82 (4H, t, *J*= 6Hz, CH<sub>2</sub>-CH<sub>2</sub>OAr), 4.07 (4H, t, *J*= 5Hz, CH<sub>2</sub>-OAr), 6.83 (4H, s, H<sub>phenyl</sub>). <sup>13</sup>C NMR (CDCl<sub>3</sub>, 200MHz) 58.4, 67.5, 69.3, 69.9, 70.0, 70.2, 71.3, 115.0, 152.5.  $\nu_{\max}$  (KBr)/cm<sup>-1</sup>: 2880, 1642, 1509, 1452, 1283, 1233, 1124, 1062, 938, 823, 747. MS: *m/z*: 402 (M).

**1,4-Dibromo-2,5-bis(trioxa-3,6,9-decyloxy)benzene (5).** Under nitrogen, 2.46 g (6.1 x 10<sup>-3</sup> mole) of **4**, diluted with 50 mL of CHCl<sub>3</sub>, was introduced into a three necked flask equipped with a condenser and a dropping funnel. 1 mL of bromine diluted with 10 mL of CHCl<sub>3</sub> was then added dropwise to the reaction mixture. After

the addition was complete, the mixture was stirred for 2 hours at room temperature and then refluxed for 24 h. After cooling, the medium was hydrolyzed with a NaOH (0.5 N) aqueous solution and the product was extracted with ether (3x40 mL), washed with water to neutrality, dried over magnesium sulphate and concentrated under vacuum. A yellow oil was obtained and was purified on a silica gel column using CH<sub>2</sub>Cl<sub>2</sub> as eluent to give **5** in 79% yield (2.7 g; 4.53 x 10<sup>-3</sup> mole). M.p. 34-35°C; Anal. Calcd for (C<sub>20</sub>H<sub>32</sub>O<sub>8</sub>Br<sub>2</sub>): C, 42.84; H, 5.75. Found: C, 42.43; H, 5.40. <sup>1</sup>H NMR (CDCl<sub>3</sub>, 200 MHz) 3.38 (6H, s, OMe), 3.52 (4H, t, *J* = 5 Hz, CH<sub>2</sub>-OMe), 3.72-3.61 (8H, m, OCH<sub>2</sub>), 3.77 (4H, t, *J* = 5 Hz, ArOCH<sub>2</sub>-CH<sub>2</sub>-OCH<sub>2</sub>), 3.86 (4H, t, *J* = 5 Hz, ArOCH<sub>2</sub>-CH<sub>2</sub>) 4.12 (4H, t, *J* = 5 Hz, ArOCH<sub>2</sub>), 7.15 (2H, s, H<sub>phenyl</sub>). <sup>13</sup>C NMR (CDCl<sub>3</sub>, 200 MHz) 59.0, 69.6, 70.2, 70.6, 70.7, 71.1, 72.0, 111.4, 119.2, 150.3.  $\nu_{\max}$  (KBr)/cm<sup>-1</sup>: 2880, 1738, 1490, 1447, 1352, 1204, 1128, 1061, 942, 847, 780. MS: *m/z*: 560 (M).

**Copolymer (6).** In a 50 mL Schlenk tube equipped with a condenser was dissolved, under a nitrogen atmosphere and at room temperature, 21.4 mg (1.8 x 10<sup>-5</sup> mole) of Pd(PPh<sub>3</sub>)<sub>4</sub> in 10 mL of a THF/DMF (1:1) solvent mixture. 1.86 x 10<sup>-3</sup> mole (0.8784 g) of **2** and 1.86 x 10<sup>-3</sup> mole (1.231 g) of 2,5-bis-(tributylstannyl)thiophene were introduced by syringe. The reaction mixture was stirred at 80°C for three days. It was then cooled down and a red precipitate formed upon addition of methanol. The solid was filtered, washed with methanol and dried under vacuum to give 0.614 g of **6**. (Yield : 84 %); <sup>1</sup>H NMR (CDCl<sub>3</sub>, 400 MHz) 3.31 (6H, s, OMe), 3.53 (4H, t, *J* = 5 Hz, CH<sub>2</sub>), 3.69 (4H, m, CH<sub>2</sub>), 3.92 (4H, m, CH<sub>2</sub>), 4.28 (4H, m, CH<sub>2</sub>), 7.4 (2H, s, H<sub>thienyl</sub>), 7.53 (2H, s, H<sub>phenyl</sub>);  $\nu_{\max}$  (KBr)/cm<sup>-1</sup>: 2963, 1490, 1455, 1404, 1261, 1214, 1107, 802, 700; Found: C, 57.90; H, 6.28; S, 7.61.

**Copolymer (7).** Copolymer **7** was obtained as above with 32.81 mg (2.8 x 10<sup>-5</sup> mole) of Pd(PPh<sub>3</sub>)<sub>4</sub>, 2.8 x 10<sup>-3</sup> mole (1.58 g) of **3** and 2.8 x 10<sup>-3</sup> mole (1.881 g) of 2,5-bis-(tributylstannyl)thiophene in 10 mL of THF/DMF (50 : 50) mixture. Yield: 90% (1.22 g). <sup>1</sup>H NMR (CDCl<sub>3</sub>, 400 MHz) 0.81 (6H, t, *J* = 4 Hz, CH<sub>3</sub>), 1.28 (4H, m, CH<sub>2</sub>), 1.48 (4H, m, CH<sub>2</sub>), 3.38 (4H, t, *J* = 5 Hz, CH<sub>2</sub>) 3.55 (4H, m, CH<sub>2</sub>), 3.69 (4H, m, CH<sub>2</sub>), 3.92 (4H, m, CH<sub>2</sub>), 4.24 (4 H, m, CH<sub>2</sub>), 7.3 (2H, s, H<sub>thienyl</sub>), 7.55 (2H, s, H<sub>phenyl</sub>);  $\nu_{\max}$  (KBr)/cm<sup>-1</sup>: 2947, 2851, 1490, 1452, 1438, 1357, 1219, 1119, 857, 800; Found: C, 63.77; H, 8.20; S, 7.16.

**Copolymer (8).** As above, copolymer **8** was obtained by use of 13.17 mg (1.1 x 10<sup>-5</sup> mole) of Pd(PPh<sub>3</sub>)<sub>4</sub>, 1.14 x 10<sup>-3</sup> mole (0.640 g) of **5** and 1.14 x 10<sup>-3</sup> mole (0.7565 g) of 2,5-bis-(tributylstannyl)thiophene in 10 mL of THF/DMF (50 : 50) mixture. Yield: 89 % (0.49 g); <sup>1</sup>H NMR (CDCl<sub>3</sub>, 400 MHz) 3.27 (6H, s, CH<sub>3</sub>), 3.44 (4H, m, CH<sub>2</sub>), 3.55 (4H, m, CH<sub>2</sub>), 3.58 (4H, m, CH<sub>2</sub>), 3.63 (4H, m, CH<sub>2</sub>), 3.70 (4H, m, CH<sub>2</sub>), 3.91 (4H, m, CH<sub>2</sub>), 4.24 (4H, m, CH<sub>2</sub>), 7.3 (2H, s, H<sub>thienyl</sub>), 7.54 (2H, s, H<sub>phenyl</sub>);  $\nu_{\max}$  (KBr)/cm<sup>-1</sup>: 2947, 1733, 1642, 1490, 1452, 1400, 1347, 1257, 1214, 1104, 933, 852, 800, 695; Found: C, 54.73; H, 6.70; S, 5.81.
